# Supplementary material for: Do emissions from landfill fires affect pregnancy outcomes? A retrospective study after arson at a solid waste facility in Sicily
Source: PubMed Central journal article supplement — BMJ Open. 2019 Jul 4;9(7):e027912. doi: 10.1136/bmjopen-2018-027912 (PMC6615803; doi:10.1136/bmjopen-2018-027912), 2019-07-04
Supplement: bmjopen-2018-027912supp001.pdf [file bmjopen-2018-027912supp001.pdf]

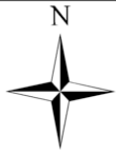

0 1.25 2.5 5 7.5 10 Kilometers

Mediterranean Sea

Gulf of Palermo

- Bellolampo MSW-L
- ▲ Air monitoring station (Boccadifalco)

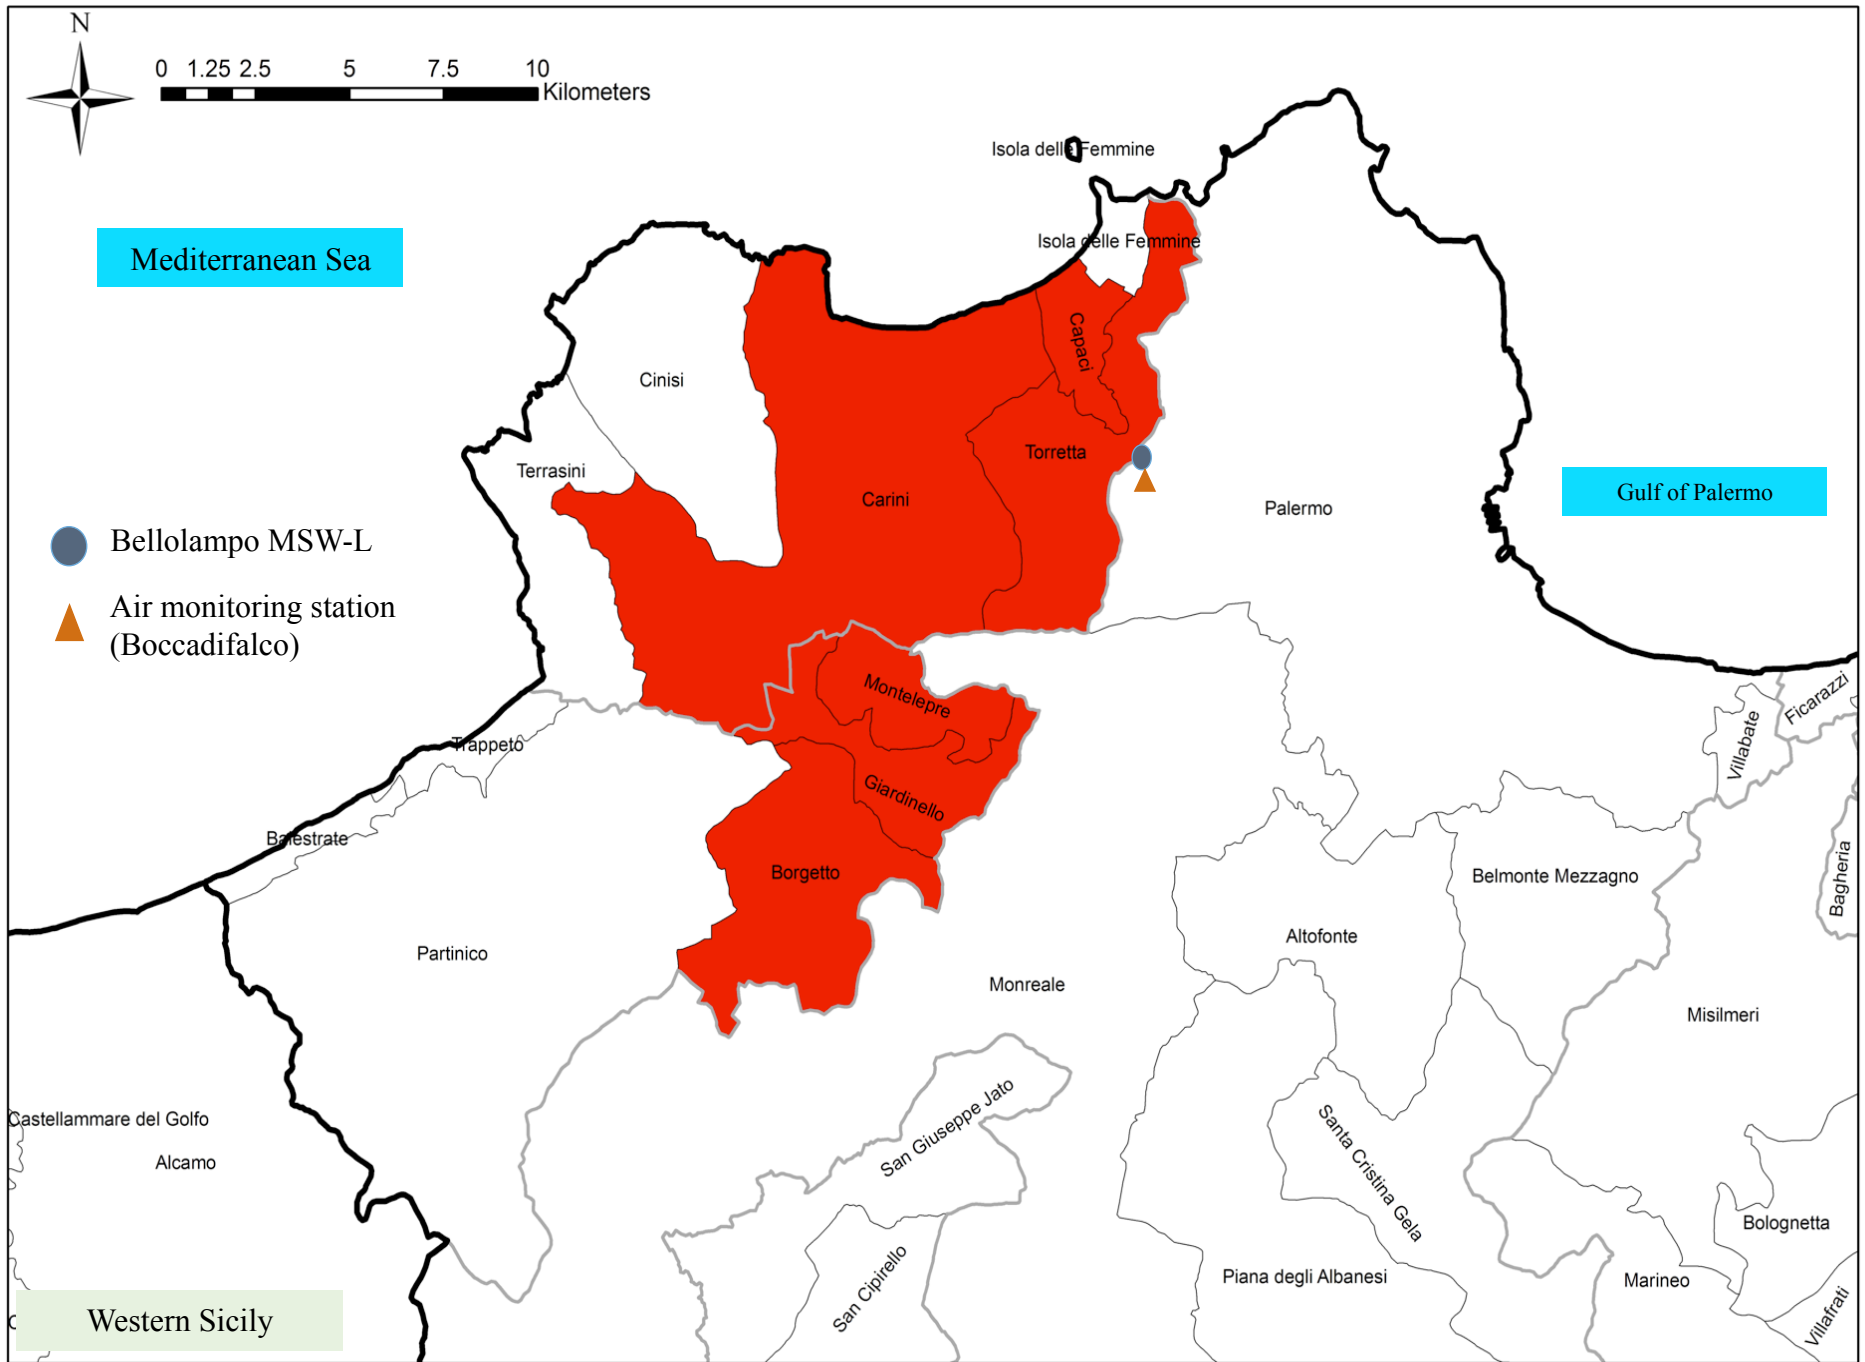

Western Sicily
